# Supplementary material for: Syntheses, crystal structure and electrochemical properties of dinuclear ruthenium complexes containing saturated and unsaturated spacers
Source: Royal Society of Chemistry journal article supplement (doi:10.1039/b502656c), 2005-01-01
Supplement: b502656c.pdf [file b502656c.pdf]

# Supplementary Material (ESI) for New Journal of Chemistry  
# This journal is © The Royal Society of Chemistry and  
# The Centre National de la Recherche Scientifique, 2005

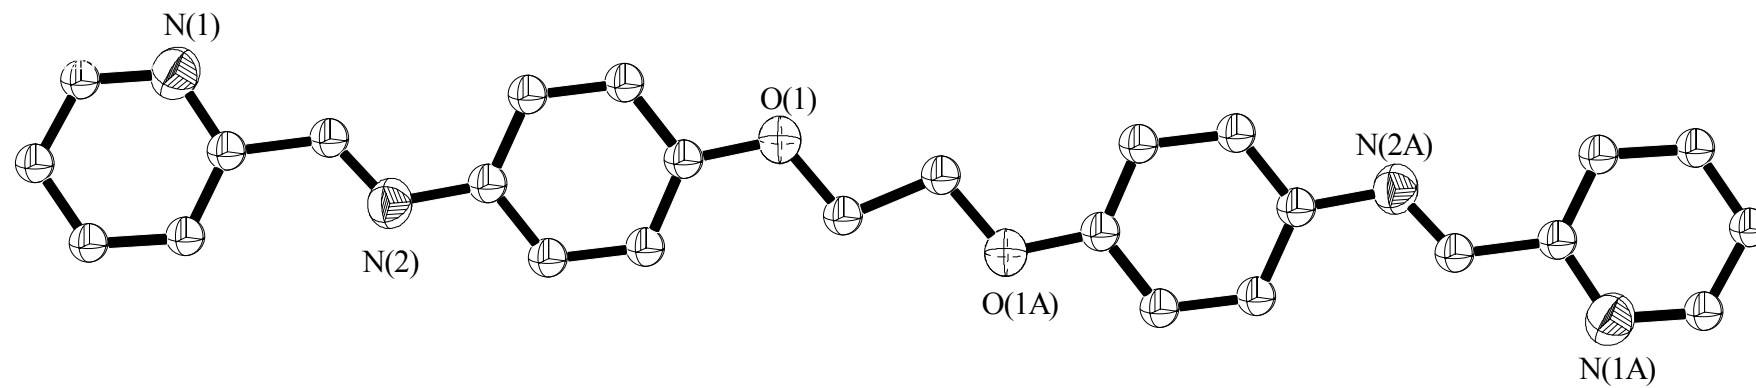

ORTEP plot of the ligand BL<sub>6</sub>.  
The hydrogen atoms and solvent molecule are omitted for clarity.
